1 **Virus infections in *Varroa destructor*-resistant honeybees**

2

3

4 Melissa A. Y. Oddie<sup>1</sup>, Sandra Lanz<sup>2</sup>, Bjørn Dahle<sup>1,3</sup>, Orlando Yañez<sup>2</sup> & Peter Neumann<sup>2,4</sup>

5

6

7 <sup>1</sup> Norwegian Beekeepers Association, Dyrskuev, 2040 Kløfta, Norway

8 <sup>2</sup> Institute of Bee Health, Vetsuisse Faculty, University of Bern, 3097 Bern, Switzerland

9 <sup>3</sup> Faculty of Environmental Sciences and Natural Resource Management, Norwegian  
10 University of Life Sciences, 1430 Ås, Norway

11 <sup>4</sup> Agroscope, Swiss Bee Research Center, 3097 Bern, Switzerland

12

13 \* Corresponding author

14 **E-mail:** melissa.oddie@norbi.no

15

16

17

## 18 **Abstract**

19 Populations of European honeybee subspecies, *Apis mellifera*, have the ability to adapt  
20 naturally to the ectoparasitic mite, *Varroa destructor*. It is possible that a tolerance to mite-  
21 vectored viruses may contribute to colony survival. If this is the case, surviving populations  
22 should show lower virus titers and prevalence compared to susceptible populations. Here, we  
23 investigated the prevalence and titers of 10 viruses, some known to be associated with *V.*  
24 *destructor*, in adult workers and pupae as well as mites. Samples were collected from both a  
25 mite-surviving and mite-susceptible honeybee population in Norway. Surviving colonies had  
26 a lower prevalence of a key virus (DWV-A) associated with *V. destructor* in individual adult  
27 bees sampled, and generally lower titers of this virus in mite infested pupae and mites within  
28 the colonies when compared to sympatric, susceptible controls. However, these surviving  
29 colonies also displayed higher prevalence and titers of two viruses not associated with  
30 *V. destructor* (BQCV & LSV1). The results of this study therefore suggest that general  
31 tolerance to virus infections is unlikely to be a key mechanism for natural colony survival in  
32 Norway, but evidence may point to mite control as a predominant mechanism.

## 33 **Keywords**

34 *Apis mellifera*, honeybees, mites, parasites, parasite resistance, *Varroa destructor*, viral  
35 tolerance

36

37

## 38 Introduction

39 Certain honeybee pathogens, such as DWV and its recombinants, which in the past were largely  
40 benign [1], have developed novel transmission pathways through the invasive ectoparasitic  
41 mite *Varroa destructor* [2] that bolster titers to the point of reducing the longevity of individual  
42 bees. This leads to colony weakening and collapse in many cases. [3,4]. As a result, *Varroa*  
43 *destructor*, which made a host shift from the Eastern honeybee *Apis cerana* to the Western  
44 honeybee *Apis mellifera*, is one of the most serious threats to Western honeybees, both  
45 domestic and wild [3–5]. Due to the limited defense mechanisms of Western honeybees, their  
46 unhindered population growth can cause numbers to reach devastating levels in late summer  
47 and autumn, when the bees required for winter hibernation are being reared [3,6]. It is known  
48 now that Western honeybee populations left untreated for at least five years have the potential  
49 to develop the ability to manage *V. destructor* infestations without the need for human-  
50 mediated mite control [7,8]. Previous evidence has pointed to several mechanisms: both  
51 mechanical, such as reduced post-capping period [9] and potential changes in brood volatiles  
52 [10], and behavioral, such as grooming [11], brood removal [12,13] and brood cell recapping  
53 [14]. One of the most prominent traits that has been detected in surviving bees, regardless of  
54 the mechanisms identified, is suppressed mite reproduction (SMR) [7,15], signified by lower  
55 reproductive output on average per foundress each reproductive cycle. SMR has been recorded  
56 not only in Africanized bee populations surviving *V. destructor* [16], but in the “more  
57 susceptible” European populations as well, including the Primorsky bees originating in Russia  
58 [17], the Gotland bees in Sweden, the Avignon bees in France [15,18] and a population in the  
59 Oslo region of Norway [8]. It has been proposed that viral tolerance is also a contributing  
60 mechanism, possibly due to changes in the dominant viral strain [19,20] or in the bees or mites  
61 themselves [21].

62 A domestic population of surviving bees in Norway [8] has been used commercially since  
63 before the introduction of *V. destructor* into the local area approximately 30 years ago.  
64 Selection efforts employed by the beekeeper managing the population included the monitoring  
65 of high honey productivity, and this trait was preserved along with the development of the  
66 mite-surviving adaptations that stemmed from the lack of treatment and subsequent selective  
67 pressure [8]. Evidence has been gathered that suggest these bees possess mechanisms that focus  
68 on controlling the parasite directly, through SMR [7,8,14]. However, tolerance to viruses is an  
69 additional possibility when considering reasons for survivability [21]. In addition, tracking bee  
70 viral loads for viruses unlinked to *V. destructor* may provide us with insight into the potential  
71 weaknesses of a rapidly adapted bee population. This study investigated potential viral  
72 tolerances and susceptibilities in a population of bees left regularly untreated for *V. destructor*  
73 (the surviving population) by comparing their viral profiles with regularly treated, *V.*  
74 *destructor*-susceptible controls in the same area. Viruses known to be associated with *V.*  
75 *destructor* infestations (DWV, SBPV) [22] as well as eight other viruses (BQCV, KBV, LSV1,  
76 LSV2, SBV, CBPV, IAPV, ABPV) were monitored in worker bees throughout the active  
77 season. DWV was monitored in both developing pupae and mites contained in their brood cells.  
78 The goal was to examine viral titer levels and gather information on the bees' potential ability  
79 to tolerate viral spread by *V. destructor*, or else reinforce previous findings that SMR and mite  
80 population control (and the subsequent decline in high-titer prevalence of DWV) is the central  
81 mechanism employed by Norwegian bees to achieve natural survivability. If viral prevalence  
82 and titer in surviving populations are high, we can assume viral tolerance plays a role. If only  
83 titer appears lower, we can assume an internal mechanism to fight infection and if prevalence  
84 is lower, we can infer that there is a mechanism that limits the spread of the virus, such as  
85 reducing mite loads. The other aim of the study was to measure viral prevalence and titer in  
86 viruses unassociated with *V. destructor* to detect potential susceptibility in the surviving

87 population to viruses that would, in un-adapted populations, not pose much of a problem. If  
88 titers or prevalence of any of these viruses are higher than in sympatric controls we could  
89 conclude that heightened susceptibilities may be present, possibly due to a genetic  
90 bottleneck during the natural selection process.

## 91 **Materials and Methods**

### 92 **Sample collection and *Varroa destructor* infestation rates**

93 In autumn 2013, spring and summer 2014, samples were taken in Østlandet, south-eastern  
94 Norway from local queenright *A. mellifera* colonies surviving *V. destructor* infestation without  
95 treatment for at least 16 years ( $N=32$ , 3 apiaries), as well as colonies, regularly treated until  
96 2011/2012 with oxalic acid and/or drone brood removal, ( $N=69$ , 7 apiaries). Adult workers  
97 were collected from outer frames inside the hive. Phoretic mites were sampled using routine  
98 washing methods (~100-400 bees, [23]). Infested pupae were sampled, and their mites  
99 collected and stored. All samples were transported on ice to Bern, Switzerland for preserving  
100 [24] and then stored at  $-80^{\circ}\text{C}$  until processing.

### 101 **Sample selection and analytic approach**

102 Pooled samples:

103 100 workers and all phoretic mites of the colonies sampled in summer 2014 ( $N=58$ ;  
104 surviving=24, susceptible=34) were pooled and homogenized for each colony.

105 Individual samples:

106 Adult workers ( $N = 11-13$  per colony) and phoretic mites (1-22 per colony) were sampled from  
107 10 surviving and 11 susceptible colonies in autumn 2013. From all three seasons (spring,  
108 summer and autumn), honey bee pupae with their corresponding mites (reproductive and non-

109 reproductive) from 47 colonies (8 apiaries), ( $N=29$  (3) Surviving and 18 (5) susceptible) were  
110 sampled from infested cells and selected for virus analysis.

## 111 **Homogenization and RNA extraction**

112 TN buffer (Tris 10mM, NaCl 10 mM; pH 7.6) was added to each sample (25 ml for pooled  
113 workers, 100-300  $\mu$ l for pooled phoretic mites, 250  $\mu$ l for individual workers and pupae and  
114 100  $\mu$ l for individual mites) and the sample was homogenized with either a Dispomix® Drive  
115 homogenizer (Medic tools) for pooled worker samples or a tissuelyser (Qiagen Retsch MM300,  
116 1 min at 25g/s) for pooled phoretic mites and all individual samples [25]. An aliquot of 50  $\mu$ l  
117 homogenate was used for RNA extraction using the NucleoSpin® RNA II kit, (Macherey-  
118 Nagel) following the manufacture's recommendations. The total extracted RNA was diluted in  
119 60  $\mu$ l of RNase-free water.

## 120 **Reverse transcription, PCR and qPCR assays**

121 The RNA was transcribed to cDNA using M-MLV reverse transcription kit (Promega)  
122 following the manufacturer's recommendations using a defined amount of RNA (1 $\mu$ g for bees  
123 and 50 ng for mites, respectively) according to fluorospectrometry (NanoDrop™ 1000)  
124 measurements [25]. cDNAs were diluted 10fold in nuclease-free water. With a standard  
125 qualitative PCR (0.125 My Taq™ polymerase (Bioline), 5 $\mu$ l 5x buffer, 1  $\mu$ l of the respective  
126 forward and reverse primers (Table S1); 2 min at 95°C, 35 cycles with 20 sec at 95°C, 20 sec  
127 at 57°C and 30 sec at 72°C, 2 min at 72°C), pooled worker and phoretic mite samples were  
128 screened for the following viruses: Deformed wing virus type A (DWV-A) and type B (DWV-  
129 B), Acute bee paralysis virus (ABPV), Israeli acute paralysis virus (IAPV), Kashmir bee virus  
130 (KBV), Chronic bee paralysis virus (CBPV), Slow bee paralysis virus (SBPV), Sacbrood virus  
131 (SBV), Bee Macula-like virus (BeeMLV), Black queen cell virus (BQCV), Lake Sinai virus 1  
132 (LSV1) and Lake Sinai virus 2 (LSV2). Similar, pooled brood samples were screened for

133 DWV-A, DWV-B, ABPV, IAPV, KBV, SBV, LSV1, LSV2, SBPV and CBPV. Positive and  
134 negative controls were used for each PCR run. Each PCR Product was analyzed on 1.2 %  
135 agarose gel. The agarose gel was stained with GelRed™ and visualized by UV light. With  
136 quantitative RT-PCR (RT-qPCR; Kapa SYBR® Fast Master Mix (KAPA, Biosystems), 10 µl  
137 master mix, 3 µl cDNA template, 0.4 µl forward and reverse target primers (10 mM) and 6.2  
138 µl Milli-Q water; 3 min at 95°C, 40 cycles of 95°C for 3 sec and 55°C for 30 sec, melting  
139 curve: 95°C for 15 sec, 55°C for 15 sec and 95°C for 15 sec) pooled worker samples, where  
140 viruses were detected with qualitative PCR, were analyzed to determine virus levels (DWV-A,  
141 BQCV, LSV1, LSV2 and SBPV). Individual adult workers and phoretic mites were analyzed  
142 individually for DWV-A by use of qPCR (protocol described above). Individual brood samples  
143 (pupae and brood mites) were analyzed individually for the viruses detected in the PCR (DWV-  
144 A, DWV-B, and SBPV, protocol described above). In order to normalize the data according to  
145 the amount of RNA, analysis of the *β-actin* gene was performed in parallel for each sample  
146 [26]. A Cq cut-off value (according to the value of the negative control) was used to define the  
147 disease status (positive or negative).

## 148 **Sequencing**

149 To confirm the virus identity of the PCR and qPCR positive samples (pooled and individual),  
150 selected PCR-products of each virus were commercially sequenced (Fasteris SA) and  
151 compared with reference sequences deposited in GenBank.

## 152 **Statistical analyses**

153 Statistical analyses were performed using NCSS Statistical Software [27]. For comparison of  
154 virus levels, a two-tailed t-test or a Mann-Whitney U test was done, depending on normal  
155 distribution (Kolmogorov-Smirnov, Skewness, Kurtosis and Omnibus Normality). Equally, for  
156 comparison of infestation rates among multiple groups one-way ANOVA or a Kruskal Wallis

157 one-way ANOVA on ranks, followed by Dunn-Bonferroni correction was performed. To take  
158 account of colony or apiary level variation, the data were additionally run through a linear  
159 mixed effects model using R 3.1.2 [28]. Virus values (# copies) were log transformed since the  
160 data covered a wide range of values of several magnitudes. Analysis of virus prevalence  
161 between groups were done with a Chi-Square test. For all statistical analyses, a significance  
162 level of  $\alpha = 0.05$  was applied.

163

## 164 **Results**

### 165 **Mite population levels**

166 Untreated colonies generally had lower phoretic mite loads (Kruskal-Wallis ANOVA, Dunn's  
167 test,  $z_{\text{spring}} > 3.04$  /  $z_{\text{summer}} > 2.94$ ,  $p < 0.01$ , however brood infestation rates were comparable  
168 between populations for the sampling period.

### 169 **Virus prevalence and viral load**

170 Pooled samples:

171 In the pooled worker and phoretic mite samples of the 58 colonies (19 surviving, 39  
172 susceptible) sampled in summer 2014, the following viruses were detected: BQCV, DWV-A,  
173 LSV1, LSV2, SBPV and CBPV. All viruses found by PCR were confirmed by sequencing.

174 The surviving colonies had a significantly higher prevalence of BQCV than the susceptible  
175 colonies (Chi-Square test:  $\chi^2 = 13.44$ ,  $p < 0.01$ , ~90% of surviving colonies and ~40% of  
176 susceptible colonies), but no such differences in prevalence were seen for any of the other  
177 tested viruses (Chi-Square tests:  $\chi^2 = 1.25-2.80$ ,  $p > 0.05$  in all cases, Fig 1).



178 **Fig 1: Colony-level Prevalence of the detected viruses in pooled worker samples in summer 2014.**

179 While there were no significant differences for most viruses (Chi Square test:  $\chi^2=1.25-2.81$ , DWV-A,  
180 LSV-1, LSV-2 and SBPV:  $p>0.05$ ), untreated (surviving) colonies had a significantly higher BQCV  
181 prevalence, compared to treated (susceptible) ones (Chi Square test,  $\chi^2=13.44$ , \*\* =  $p<0.01$ ).

182 When comparing virus titers between surviving and susceptible colonies, the surviving  
183 colonies had higher BQCV and LSV1 loads (BQCV: Mann-Whitney and LSV1: two-tailed t-  
184 test;  $p<0.01$ ), but no significant differences were detected for DWV-A, LSV2 and SBPV  
185 (Mann-Whitney,  $p>0.05$  in all cases, Fig 2).

186 **Fig 2: Viral titers of the detected viruses in pooled worker samples of summer 2014 from**  
187 **untreated (surviving) and treated (susceptible) colonies.** Medians, interquartile ranges and maxima  
188 are shown. While there were no significant differences for most viruses (DWV-A: Mann-Whitney,  
189 LSV2, SBPV: two-tailed t-test,  $p>0.05$ ) surviving colonies had significantly higher BQCV and LSV1  
190 loads, compared to treated ones (BQCV: Mann-Whitney, LSV1: two-tailed t-test; \*\* =  $p<0.01$ ).

191 Individual samples:

192 No differences of the DWV-A titers between the surviving and susceptible colonies were  
193 found, neither for workers ( $N=201$ , Mann-Whitney,  $U_{\text{surviving}}=4131$ ,  $U_{\text{susceptible}}=5463$ ,  $p>0.05$ ),  
194 nor mites ( $N=107$ , Mann-Whitney,  $U_{\text{surviving}}=1395$ ,  $U_{\text{susceptible}}=1395$ ,  $p>0.05$ ). However,  
195 surviving colonies showed a significantly lower proportion of DWV-A positive workers than  
196 treated colonies did (Chi-Square test:  $\chi^2=33.751$ ,  $p<0.01$ , Fig 3, ~65% surviving workers and  
197 ~95% of susceptible workers).

198 **Fig 3: Prevalence of DWV-A in workers and phoretic mites of autumn 2013 from untreated**  
199 **(surviving) and treated (susceptible) colonies.** Means are shown. While there was no significant  
200 difference in the proportions of DWV-A positive mites (Chi Square,  $\chi^2=2.455$ ,  $p>0.05$ ), significantly  
201 fewer workers from surviving colonies had detectable DWV-A titers compared to susceptible colonies  
202 (Chi Square,  $\chi^2 33.751$ , \*\* =  $p<0.01$ ).

203 Viruses detected in brood and associated mites were Deformed wing virus-A (DWV-A),  
204 Deformed wing virus-B (DWV-B) and Slow bee paralysis virus (SBPV). No significant  
205 differences of virus prevalence were detected between susceptible and surviving pupae and  
206 mites for all tested viruses (Chi-Square:  $\chi^2=0.76-3.17$ ,  $p>0.05$ ). Comparison of titers from  
207 susceptible and surviving pupae revealed that those from the susceptible colonies had  
208 significantly higher DWV-A titers (Mann-Whitney, workers:  $U_{\text{treated}} = 1511$ ,  $U_{\text{surviving}} = 541$ ,  
209 mites:  $U_{\text{susceptible}} = 2500$ ,  $U_{\text{surviving}} = 620$ ,  $p<0.01$  for workers and mites, Fig 4).

210 **Fig 4: DWV-A titers of individual honeybee pupae and their associated mites in untreated**  
211 **(surviving) and treated (susceptible) colonies from all seasons.** Medians, interquartile ranges and  
212 maxima are shown. Both pupae and mites from susceptible colonies had significantly higher DWV-A  
213 titers than those from surviving colonies (Mann-Whitney, workers:  $U_{\text{susceptible}}=1511$ ,  $U_{\text{surviving}}=541$ ,  
214 mites:  $U_{\text{susceptible}}=2500$ ,  $U_{\text{surviving}}=620$ ,  $** = p<0.01$ ).

215 No significant differences were detected between surviving and susceptible pupae and mites  
216 for DWV-B and SBPV titers.

217

## 218 Discussion

219 The proportion of adult workers and pupae that tested positive for one of the most prominent  
220 mite-transmitted viruses (DWV-A) was lower in surviving colonies than in susceptible  
221 controls, meaning the virus may have had a reduced transmission frequency, likely brought  
222 about by fewer phoretic mites. Individual adult workers in the surviving population had a  
223 higher prevalence for BQCV and higher titers of this virus as well as one other not commonly  
224 associated with *V. destructor* (LSV1) and this may suggest a reduced ability to overcome  
225 infections from these viruses.

226 Though the DWV-A titer level was not different between individual adult worker bees in both  
227 colony groups (surviving and susceptible) the proportion of workers that tested positive for  
228 DWV-A was significantly lower. Phoretic mites did not have significantly different viral  
229 prevalence or titer between surviving and susceptible groups, meaning the mites were just as  
230 capable of spreading infection in surviving colonies as susceptible colonies. If viral tolerance  
231 played a role in mite-survivability we may not have seen such a distinction in viral prevalence.  
232 As prevalence is reduced in surviving colonies, it can be considered that the control factor is  
233 focused on reducing the probability of viral infection, i.e. reducing the mite loads. Viral  
234 prevalence in infested pupae was not different between surviving and susceptible colony  
235 groups and this also aligns with the idea of mite-targeted survival strategies: If a cell is infested,  
236 it has the same probability of becoming infected with a mite-transmitted virus.

237 The reason we do not see this lower prevalence in the pupae could be because only infested  
238 pupae were sampled, though no differences in pupal infestation rates were found in this study,  
239 there were differences in phoretic mite load, and these surviving colonies have historically  
240 displayed consistently lower mite loads both phoretically and in brood [8].

241 Interestingly, there was a difference in DWV-A titers in both pupae and associated mites when  
242 comparing the colony groups (surviving and susceptible): surviving pupae and mites had lower  
243 titers of this virus. There is a possibility that this is due to the lower frequency of bees being  
244 bitten by mites (due to reduced mite load) and therefore a lower general level of DWV-A  
245 circulating within the population, however workers that did test positive for the virus did not  
246 display a difference in titer, nor did the phoretic mites. More likely, the mite-surviving strategy  
247 relies on reducing the number of offspring produced in mite-infested pupal cells (SMR: [7,8,29])  
248 and the lower number of offspring reduces viral transference in the closed system of the cell.  
249 These differences, though statistically significant, were small, but they provide further  
250 evidence that reducing mite loads is the predominant surviving trait.

251 Surviving colonies had higher titers of BQCV and LSV1 and a higher prevalence of BQCV. In  
252 another surviving population in Sweden, BQCV and SBV titers decreased substantially  
253 compared to a local susceptible population [21]. The history of these Norwegian colonies  
254 contains a sharp reduction in population and a steady increase again from those few colonies  
255 that survived [7]. It is possible that the reduction of genetic material being bred from at the  
256 time created a larger susceptibility to generally non-lethal threats as has been shown in previous  
257 work [30]. Despite evolved strategies to combat inbreeding [31] bee species can suffer the  
258 effects of genetic bottlenecks [32–35]. It may also be possible that the strategy of mite-  
259 survival may leave the colonies more vulnerable to other pathogens, in the way it is employed.  
260 The presence of SMR in all recorded surviving populations [7,8,29] is good evidence to suggest  
261 that the reduction of mite infestation levels is the most successful natural strategy to mitigate  
262 the damages of *V. destructor* in populations of Western honey bee. With consistent evidence  
263 of hindering mite population growth in all populations, this strategy seems to be present  
264 everywhere Western honeybees are permitted to adapt naturally and should therefore be a core  
265 focus of *Varroa destructor*-resistant breeding efforts. Viral tolerance cannot be discounted,  
266 however future studies on mite survivability might benefit from a focus on regulating the  
267 parasite populations and not enduring them.

268

## 269 **Acknowledgments**

270 We are grateful to the cooperating beekeepers that allowed us to collect samples from their  
271 honeybee colonies.

## 272 **Funding**

273 Financial support was granted to Peter Neumann and Bjørn Dahle by the Vinetum foundation  
274 and by the Research Council of Norway (grant. Nb 207694) respectively.

275

## 276 **References**

277

- 278 1. Martin SJ, Highfield AC, Brettell L, Villalobos EM, Budge GE, Powell M, et al. Global  
279 Honey Bee Viral Landscape Altered by a Parasitic Mite. *Science*. 2012;336: 1304–1306.  
280 doi:10.1126/science.1220941
- 281 2. Anderson DL, Trueman JWH. *Varroa jacobsoni* (Acari: Varroidae) is more than one  
282 species. *Exp Appl Acarol*. 2000;24: 165–189. doi:10.1023/A:1006456720416
- 283 3. Rosenkranz P, Aumeier P, Ziegelmann B. Biology and control of *Varroa destructor*. *J*  
284 *Invert Path*. 2010;103: S96–S119. doi:10.1016/j.jip.2009.07.016
- 285 4. Dainat B, Evans JD, Chen YP, Gauthier L, Neumann P. Dead or Alive: Deformed Wing  
286 Virus and *Varroa destructor* Reduce the Life Span of Winter Honeybees. *Appl Environ*  
287 *Microbiol*. 2012;78: 981–987. doi:10.1128/AEM.06537-11
- 288 5. Conte YL, Ellis M, Ritter W. Varroa mites and honey bee health: can Varroa explain part  
289 of the colony losses? *Apidologie*. 2010;41: 353–363. doi:10.1051/apido/2010017
- 290 6. Dietemann V, Pflugfelder J, Anderson D, Charrière J-D, Chejanovsky N, Dainat B, et al.  
291 *Varroa destructor*: research avenues towards sustainable control. *J Apic Res*. 2012;51:  
292 125–132. doi:10.3896/IBRA.1.51.1.15
- 293 7. Locke B. Natural Varroa mite-surviving *Apis mellifera* honeybee populations.  
294 *Apidologie*. 2016;47: 467–482. doi:10.1007/s13592-015-0412-8
- 295 8. Oddie MAY, Dahle B, Neumann P. Norwegian honey bees surviving *Varroa destructor*  
296 mite infestations by means of natural selection. *PeerJ*. 2017;5: e3956.  
297 doi:10.7717/peerj.3956
- 298 9. Oddie MAY, Dahle B, Neumann P. Reduced Postcapping Period in Honey Bees  
299 Surviving *Varroa destructor* by Means of Natural Selection. *Insects*. 2018;9: 149.  
300 doi:10.3390/insects9040149
- 301 10. Mondet F, Kim SH, Miranda JR de, Beslay D, Conte YL, Mercer AR. Specific Cues  
302 Associated With Honey Bee Social Defence against *Varroa destructor* Infested Brood.  
303 *Sci Rep*. 2016;6: 1–8. doi:10.1038/srep25444
- 304 11. Guzman-Novoa E, Emsen B, Unger P, Espinosa-Montaña LG, Petukhova T. Genotypic  
305 variability and relationships between mite infestation levels, mite damage, grooming

- 306 intensity, and removal of *Varroa destructor* mites in selected strains of worker honey  
307 bees (*Apis mellifera* L.). *J Invert Path.* 2012;110: 314–320. doi:10.1016/j.jip.2012.03.020
- 308 12. Harris JW, Danka RG, Villa JD. Honey Bees (Hymenoptera: Apidae) with the Trait of  
309 Varroa Sensitive Hygiene Remove Brood with All Reproductive Stages of Varroa Mites  
310 (Mesostigmata: Varroidae). *Ann Entomol Soc Am.* 2010;103: 146–152.  
311 doi:10.1603/AN09138
- 312 13. Danka RG, Harris JW, Villa JD. Expression of Varroa Sensitive Hygiene (VSH) in  
313 Commercial VSH Honey Bees (Hymenoptera: Apidae). *J Econ Entomol.* 2011;104: 745–  
314 749. doi:10.1603/EC10401
- 315 14. Oddie M, Büchler R, Dahle B, Kovacic M, Conte YL, Locke B, et al. Rapid parallel  
316 evolution overcomes global honey bee parasite. *Sci Rep.* 2018;8: 1–9.  
317 doi:10.1038/s41598-018-26001-7
- 318 15. Locke B, Conte YL, Crauser D, Fries I. Host adaptations reduce the reproductive success  
319 of *Varroa destructor* in two distinct European honey bee populations. *Ecol Evol.* 2012;2:  
320 1144–1150. doi:10.1002/ece3.248
- 321 16. Camazine S. Differential Reproduction of the Mite, *Varroa jacobsoni* (Mesostigmata:  
322 Varroidae), on Africanized and European Honey Bees (Hymenoptera: Apidae). *Ann*  
323 *Entomol Soc Am.* 1986;79: 801–803. doi:10.1093/aesa/79.5.801
- 324 17. de Guzman LI, Rinderer TE, Frake AM. Comparative reproduction of *Varroa destructor*  
325 in different types of Russian and Italian honey bee combs. *Exp Appl Acarol.* 2008;44:  
326 227–238. doi:10.1007/s10493-008-9142-1
- 327 18. Locke B, Fries I. Characteristics of honey bee colonies (*Apis mellifera*) in Sweden  
328 surviving *Varroa destructor* infestation. *Apidologie.* 2011;42: 533–542.  
329 doi:10.1007/s13592-011-0029-5
- 330 19. De Jong D, Soares AEE. An isolated population of Italian bees that has survived *Varroa*  
331 *jacobsoni* infestation without treatment for over 12 years. *Am Bee J.* 1997; 742–745.
- 332 20. Kevill JL, de Souza FS, Sharples C, Oliver R, Schroeder DC, Martin SJ. DWV-A Lethal  
333 to Honey Bees (*Apis mellifera*): A Colony Level Survey of DWV Variants (A, B, and C)  
334 in England, Wales, and 32 States across the US. *Viruses.* 2019;11: 426.  
335 doi:10.3390/v11050426
- 336 21. Locke B, Forsgren E, Miranda JR de. Increased Tolerance and Resistance to Virus  
337 Infections: A Possible Factor in the Survival of *Varroa destructor*-Resistant Honey Bees  
338 (*Apis mellifera*). *PLOS ONE.* 2014;9: e99998. doi:10.1371/journal.pone.0099998
- 339 22. Carreck NL, Ball BV, Martin SJ. Honey bee colony collapse and changes in viral  
340 prevalence associated with *Varroa destructor*. *J Apic Res.* 2010;49: 93–94.  
341 doi:10.3896/IBRA.1.49.1.13
- 342 23. Dietemann V, Nazzi F, Martin SJ, Anderson DL, Locke B, Delaplane KS, et al. Standard  
343 methods for varroa research. *J Apic Res.* 2013;52: 1–54. doi:10.3896/IBRA.1.52.1.09

- 344 24. Dainat B, Evans JD, Chen YP, Neumann P. Sampling and RNA quality for diagnosis of  
345 honey bee viruses using quantitative PCR. *Journal of Virological Methods*. 2011;174:  
346 150–152. doi:10.1016/j.jviromet.2011.03.029
- 347 25. Evans JD, Schwarz RS, Chen YP, Budge G, Cornman RS, De la Rúa P, et al. Standard  
348 methods for molecular research in *Apis mellifera*. In: Dietemann V, Ellis JD, Neumann P,  
349 editors. *The COLOSS BEEBOOK, Volume I: standard methods for Apis mellifera*  
350 research *J Apic Res*. 2013.
- 351 26. Lourenço AP, Mackert A, Cristino A dos S, Simões ZLP. Validation of reference genes  
352 for gene expression studies in the honey bee, *Apis mellifera*, by quantitative real-time  
353 RT-PCR. *Apidologie*. 2008;39: 372–385.
- 354 27. NCSS. NCSS 9 Statistical Software. Kaysville, Utah, USA; 2013. Available:  
355 [ncss.com/software/ncss](http://ncss.com/software/ncss).
- 356 28. R Core Team. R: A language and environment for statistical computing. R Foundation for  
357 Statistical Computing. Vienna, Austria; 2013. Available: [http://www.r-](http://www.r-project.org/index.html)  
358 [project.org/index.html](http://www.r-project.org/index.html)
- 359 29. Conte YL, Vaublanc G de, Crauser D, Jeanne F, Rousselle J-C, Bécard J-M. Honey bee  
360 colonies that have survived *Varroa destructor*. *Apidologie*. 2007;38: 566–572.  
361 doi:10.1051/apido:2007040
- 362 30. Tarpy DR. Genetic diversity within honeybee colonies prevents severe infections and  
363 promotes colony growth. *Proceedings of the Royal Society of London Series B:*  
364 *Biological Sciences*. 2003;270: 99–103. doi:10.1098/rspb.2002.2199
- 365 31. Rinderer TE. *Bee Genetics and Breeding*. Orlando FL, USA: Academic Press; 2013.
- 366 32. Schmid-Hempel P, Schmid-Hempel R, Brunner PC, Seeman OD, Allen GR. Invasion  
367 success of the bumblebee, *Bombus terrestris*, despite a drastic genetic bottleneck.  
368 *Heredity*. 2007;99: 414–422. doi:10.1038/sj.hdy.6801017
- 369 33. Zayed A. Bee genetics and conservation. *Apidologie*. 2009;40: 237–262.  
370 doi:10.1051/apido/2009026
- 371 34. Alves DA, Imperatriz-Fonseca VL, Franco TM, Santos-Filho PS, Billen J, Wenseleers  
372 T. Successful maintenance of a stingless bee population despite a severe genetic  
373 bottleneck. *Conserv Genet*. 2011;12: 647–658. doi:10.1007/s10592-010-0171-z
- 374 35. Cobey SW, Sheppard WS, Tarpy DR. *Status of Breeding Practices and Genetic Diversity*  
375 *in Domestic U.S. Honey Bees*. Boca Raton, FL, USA: CRC; 2012.

376

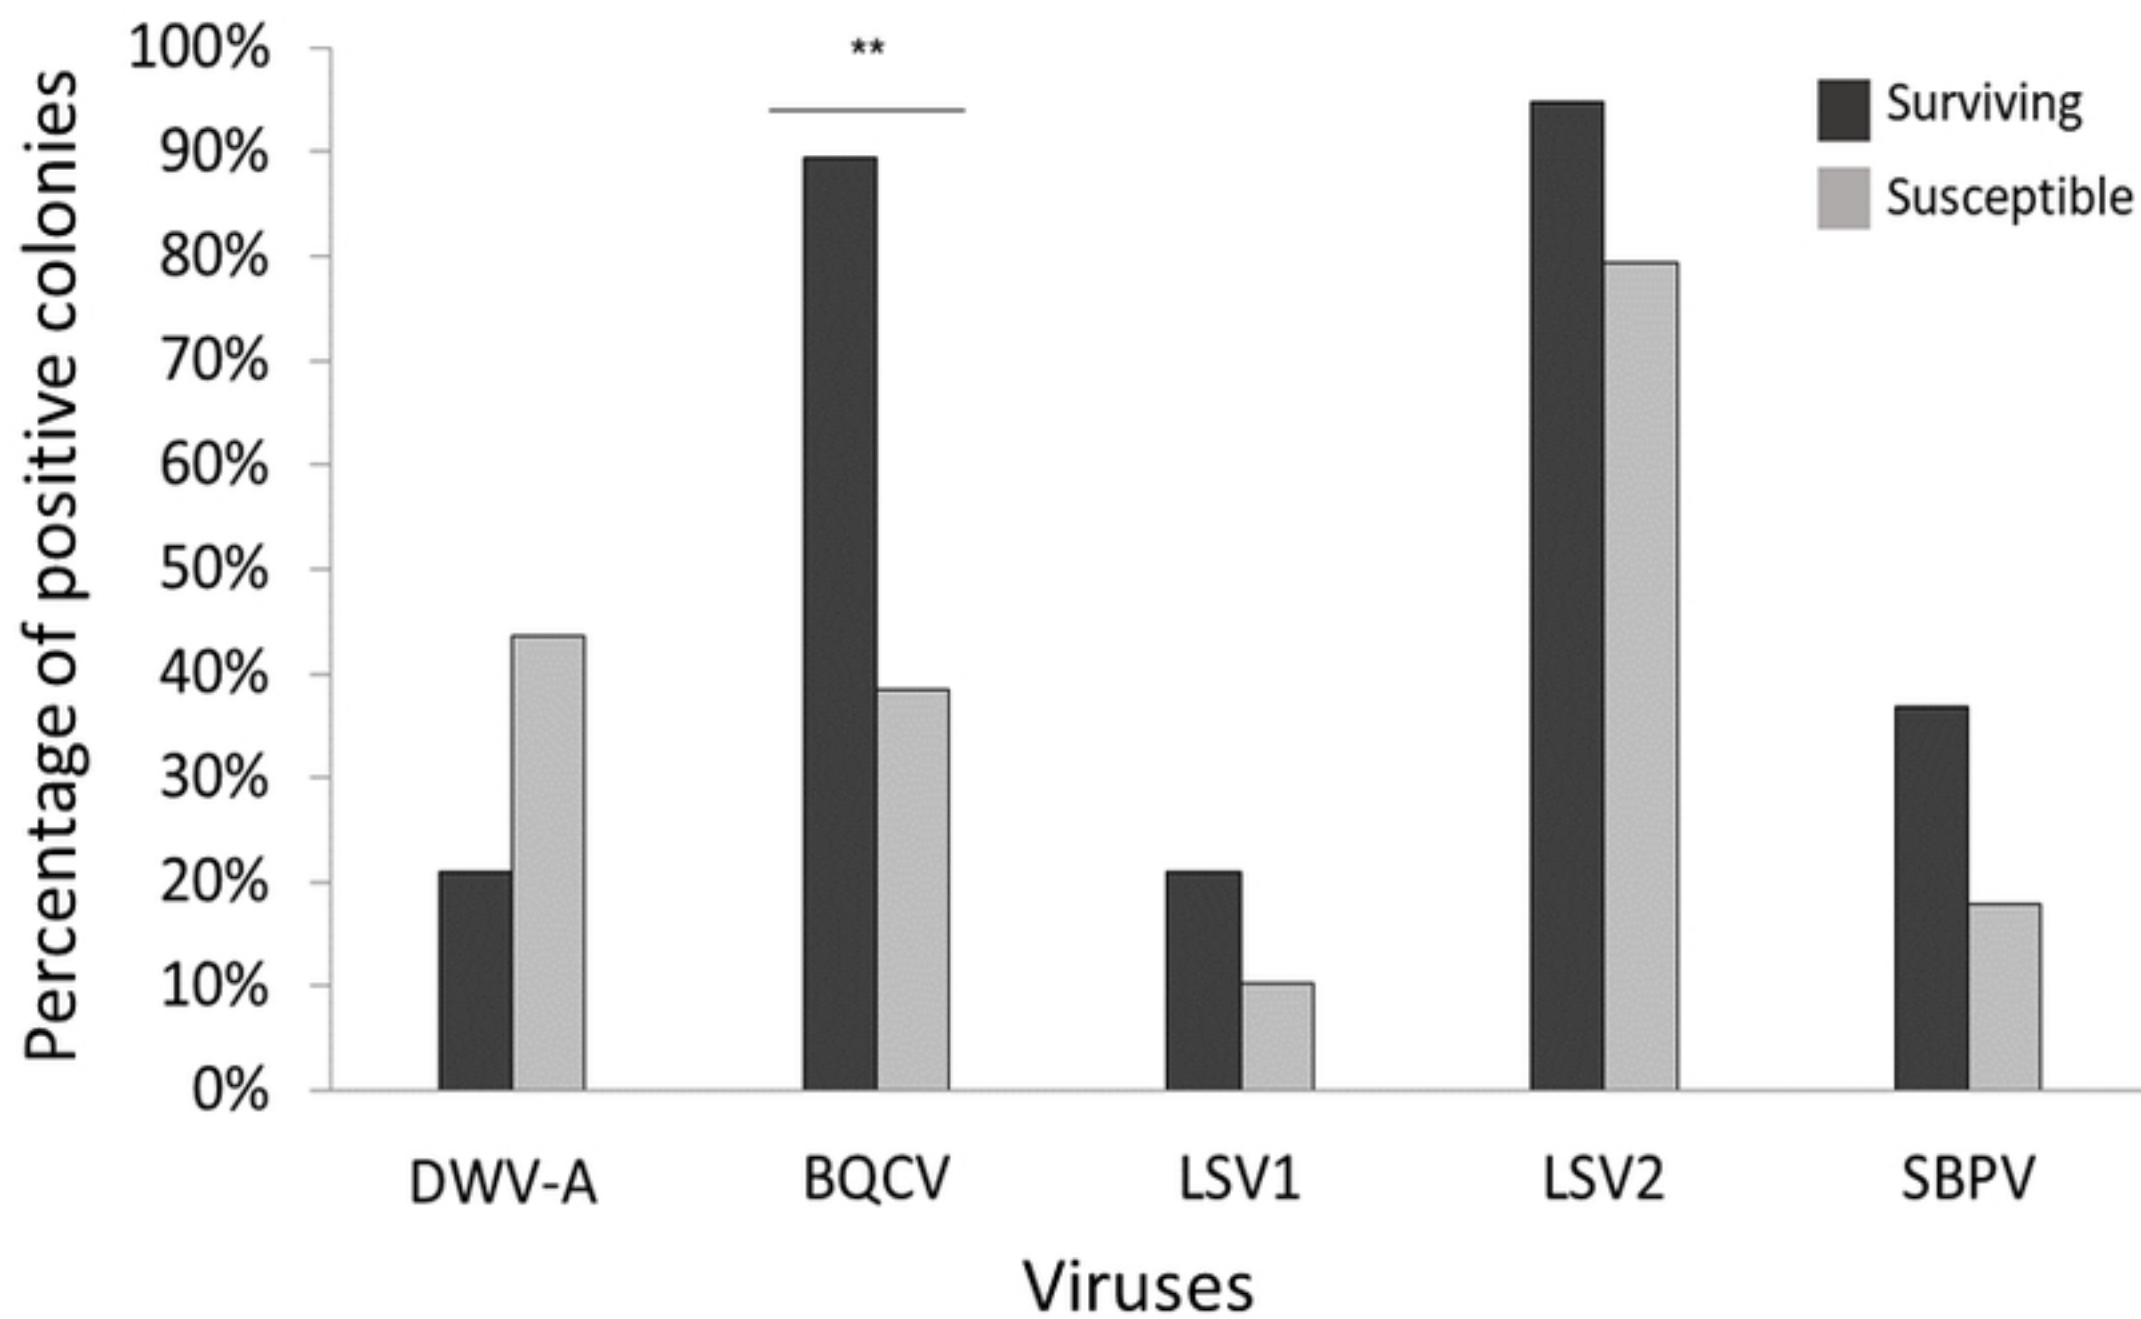

Figure 1



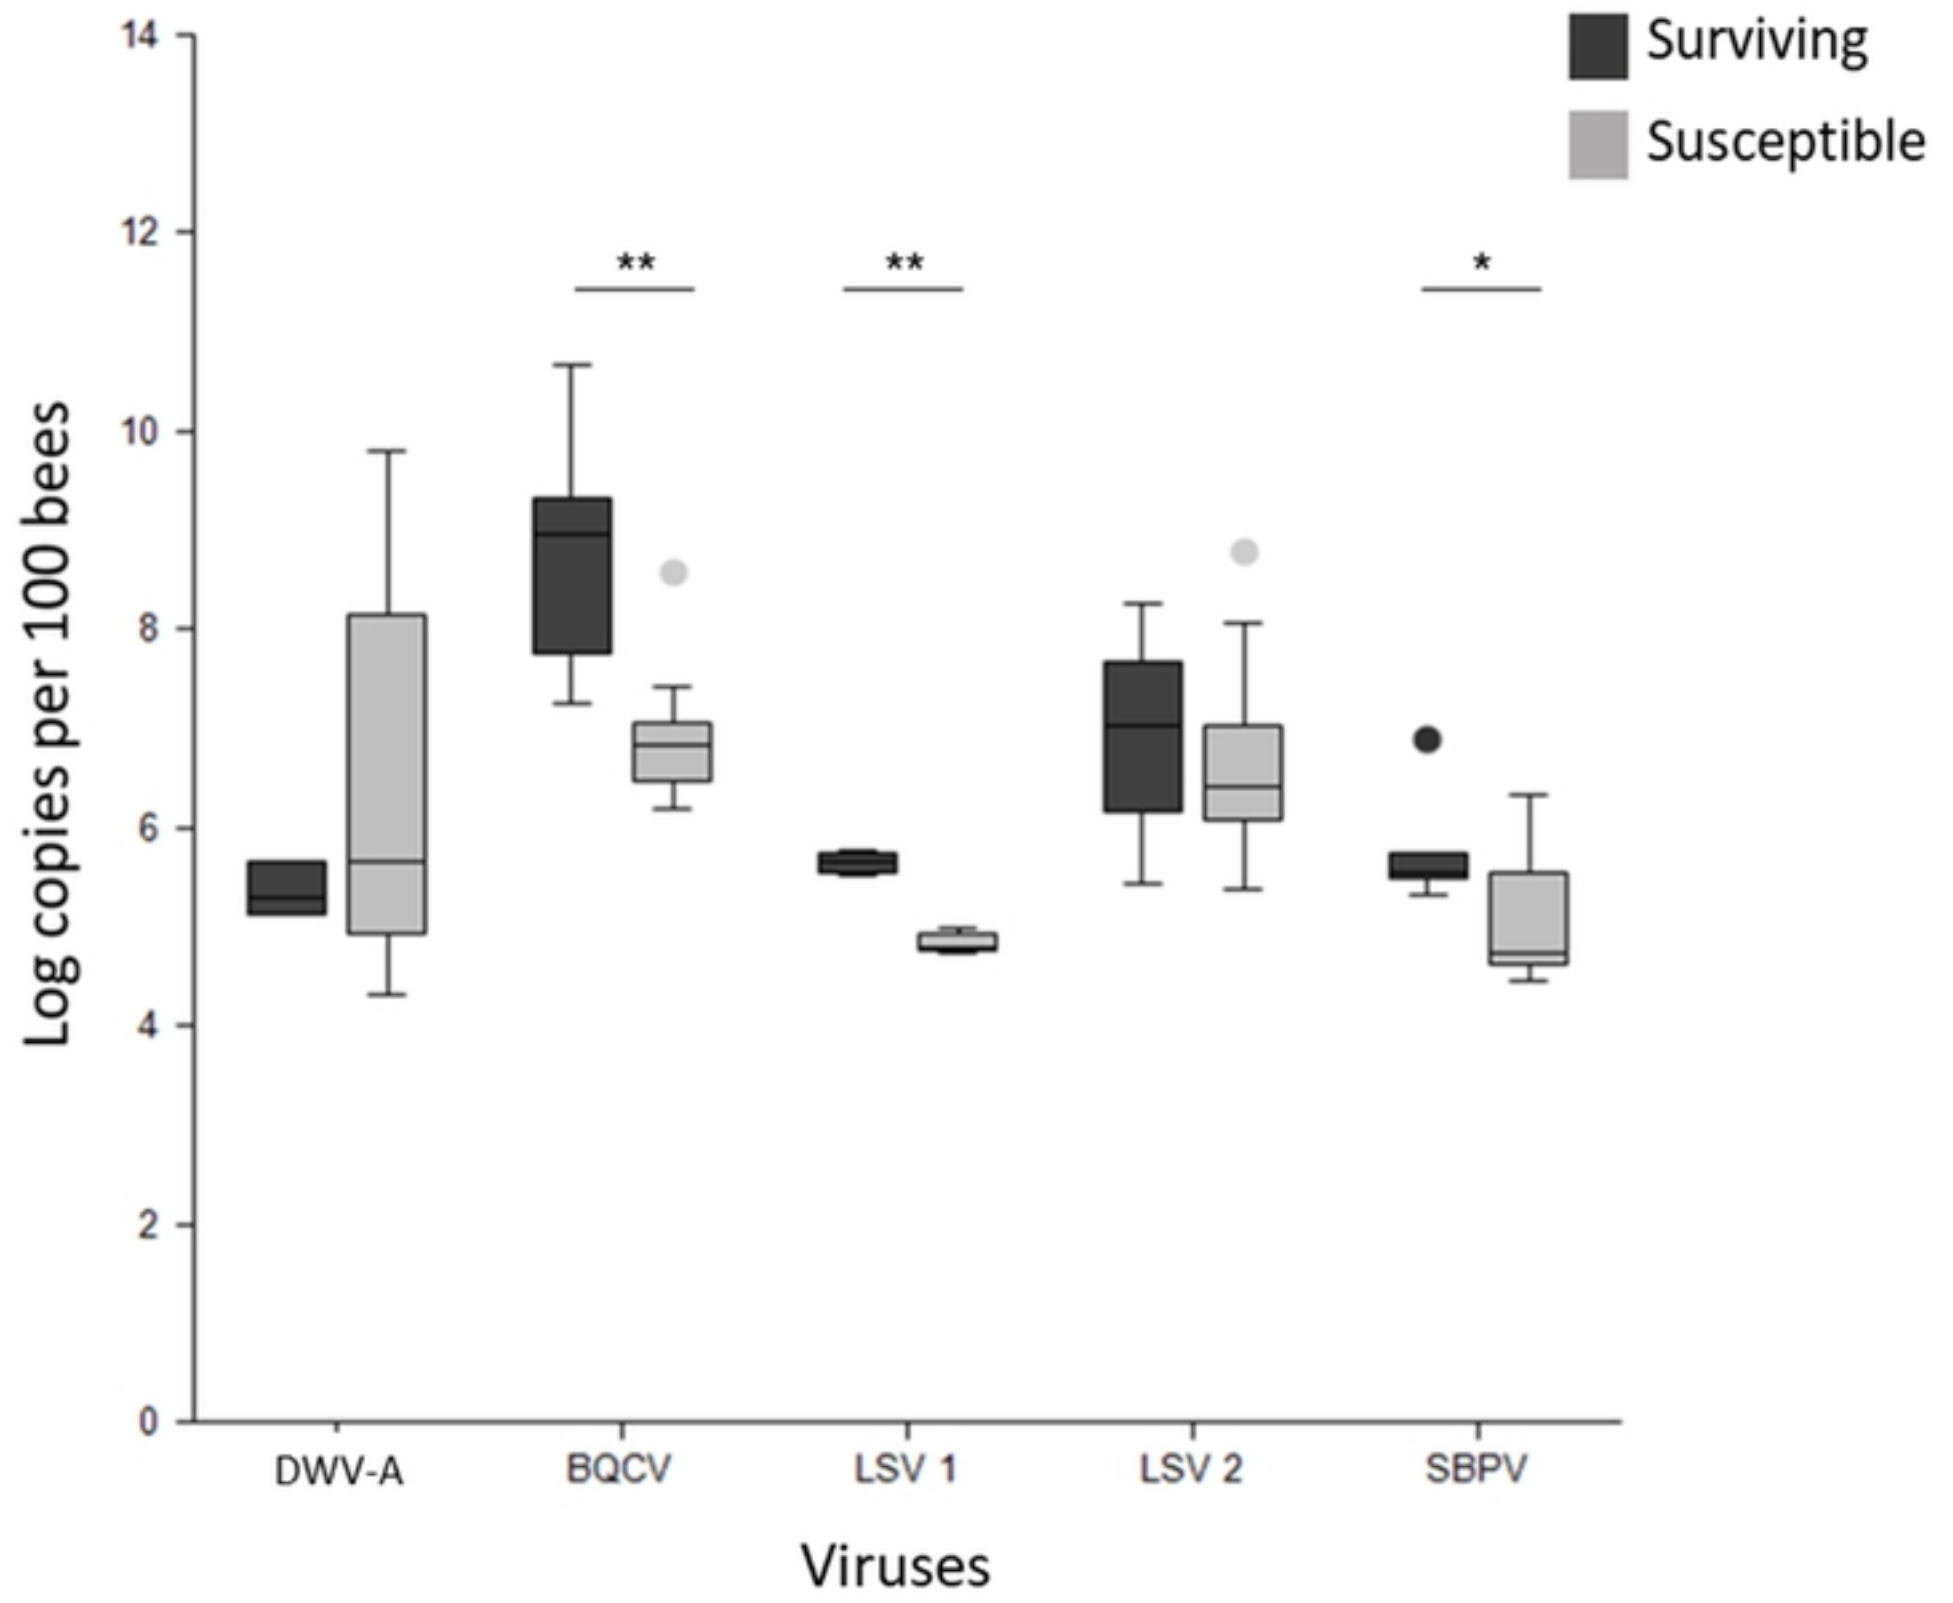

Figure 2

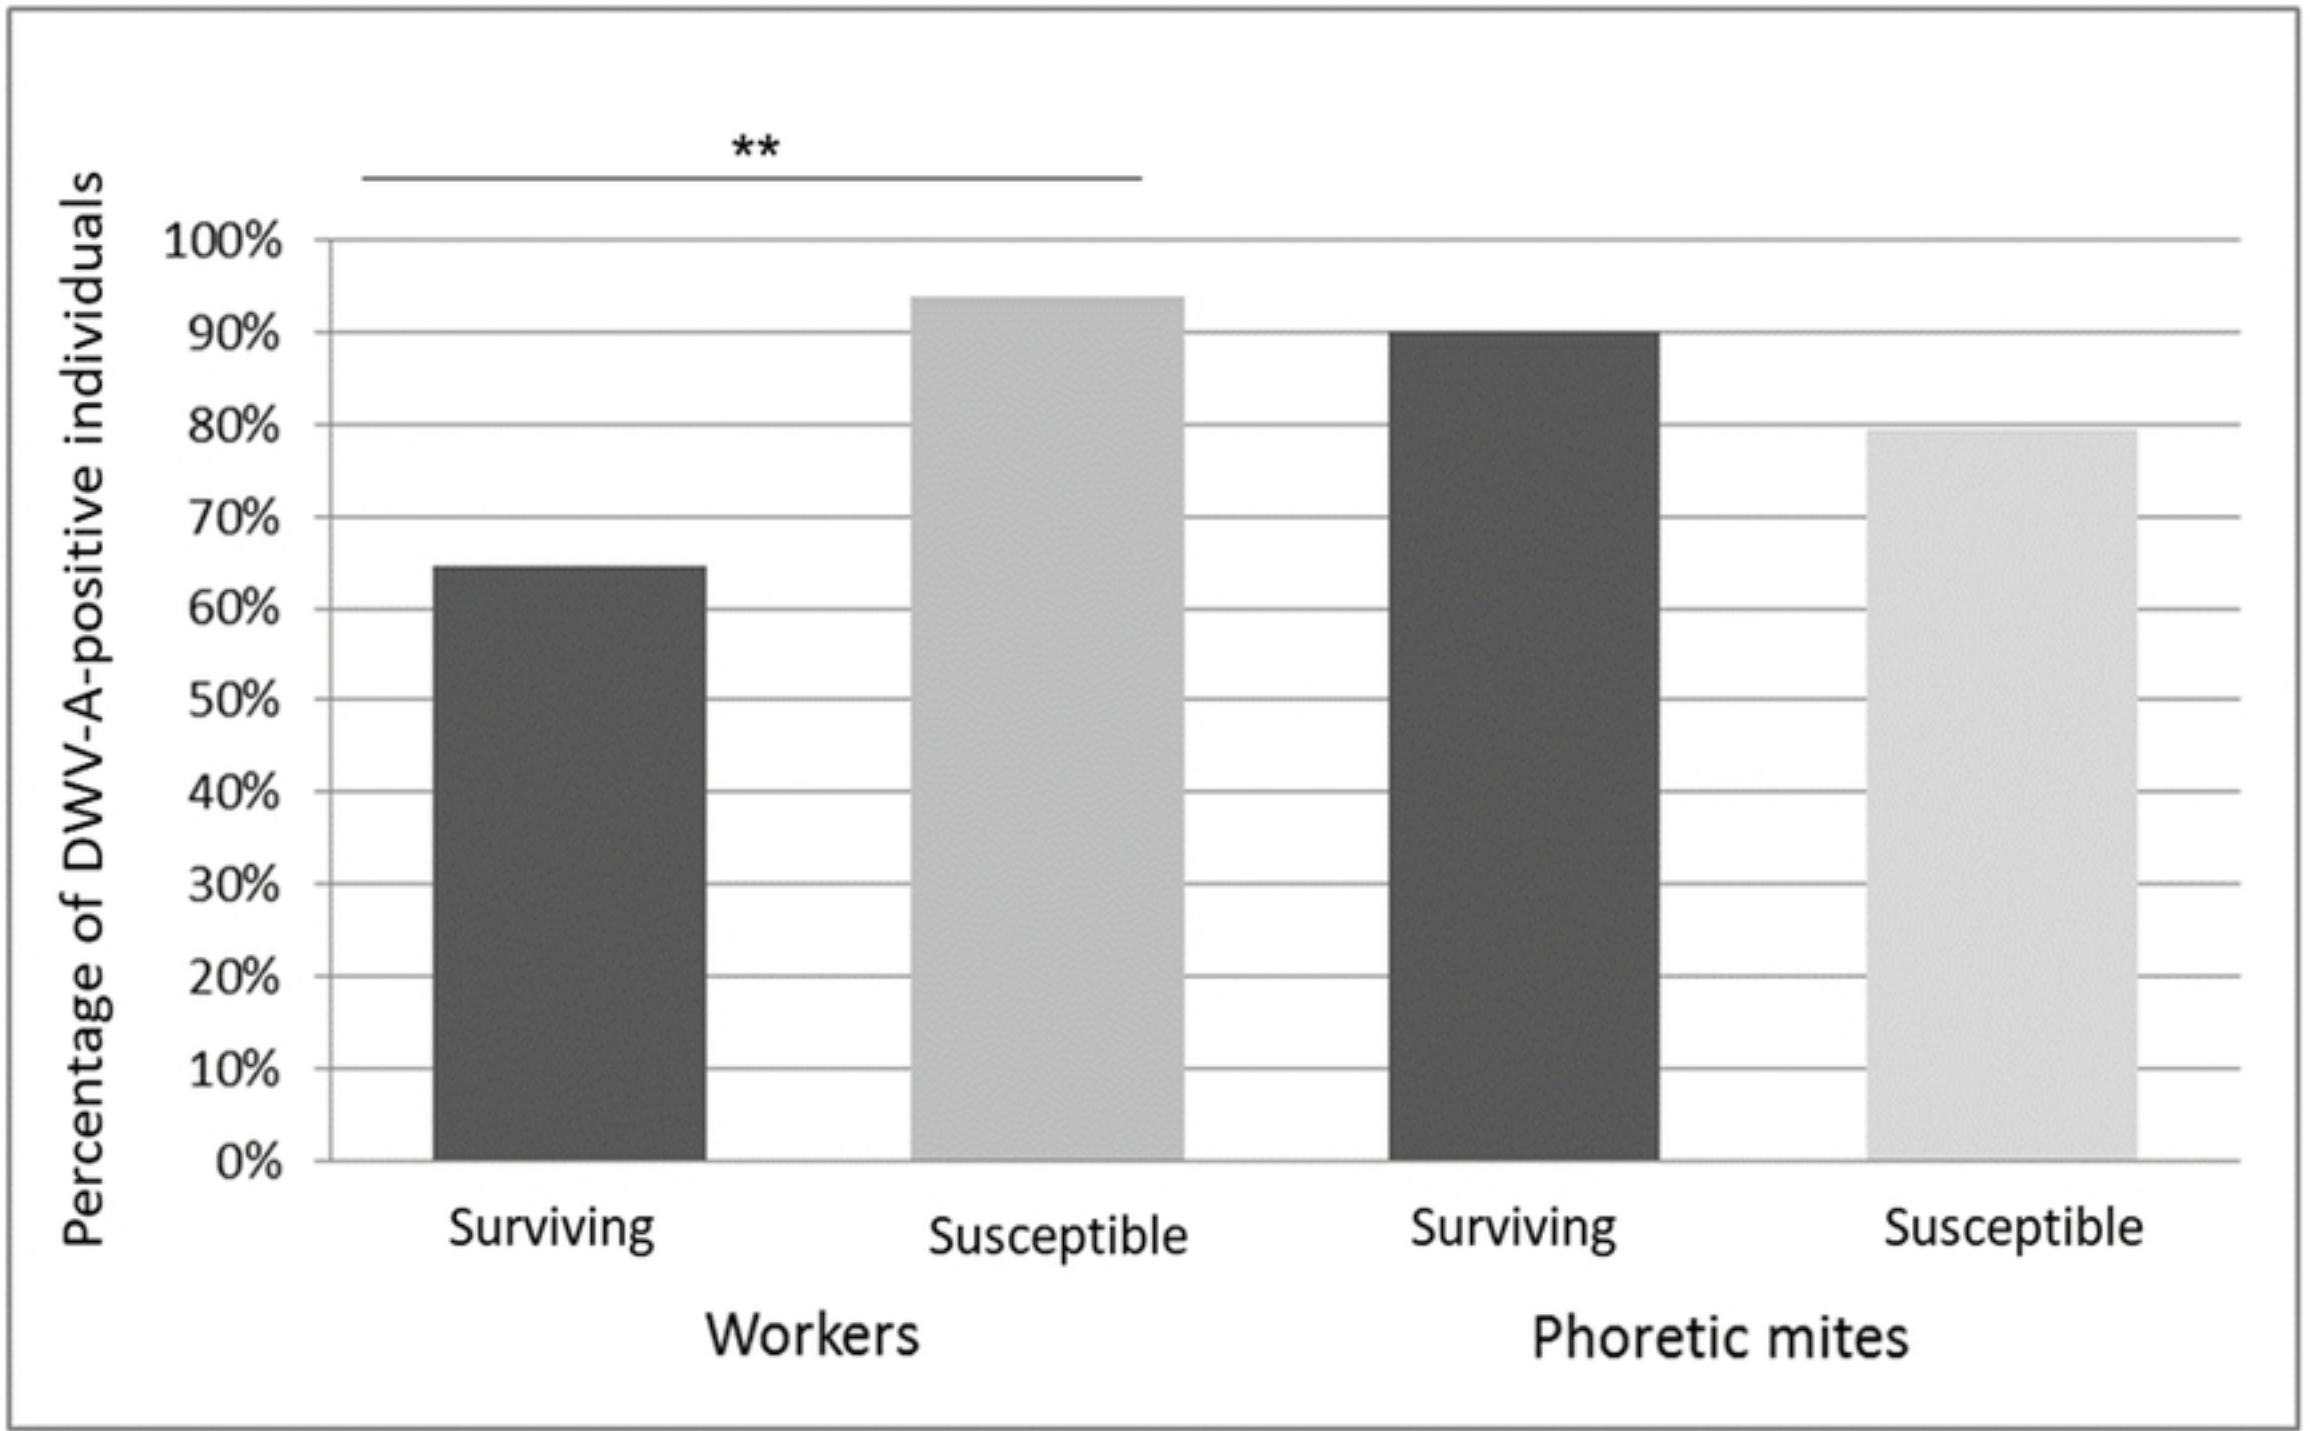

Figure 3

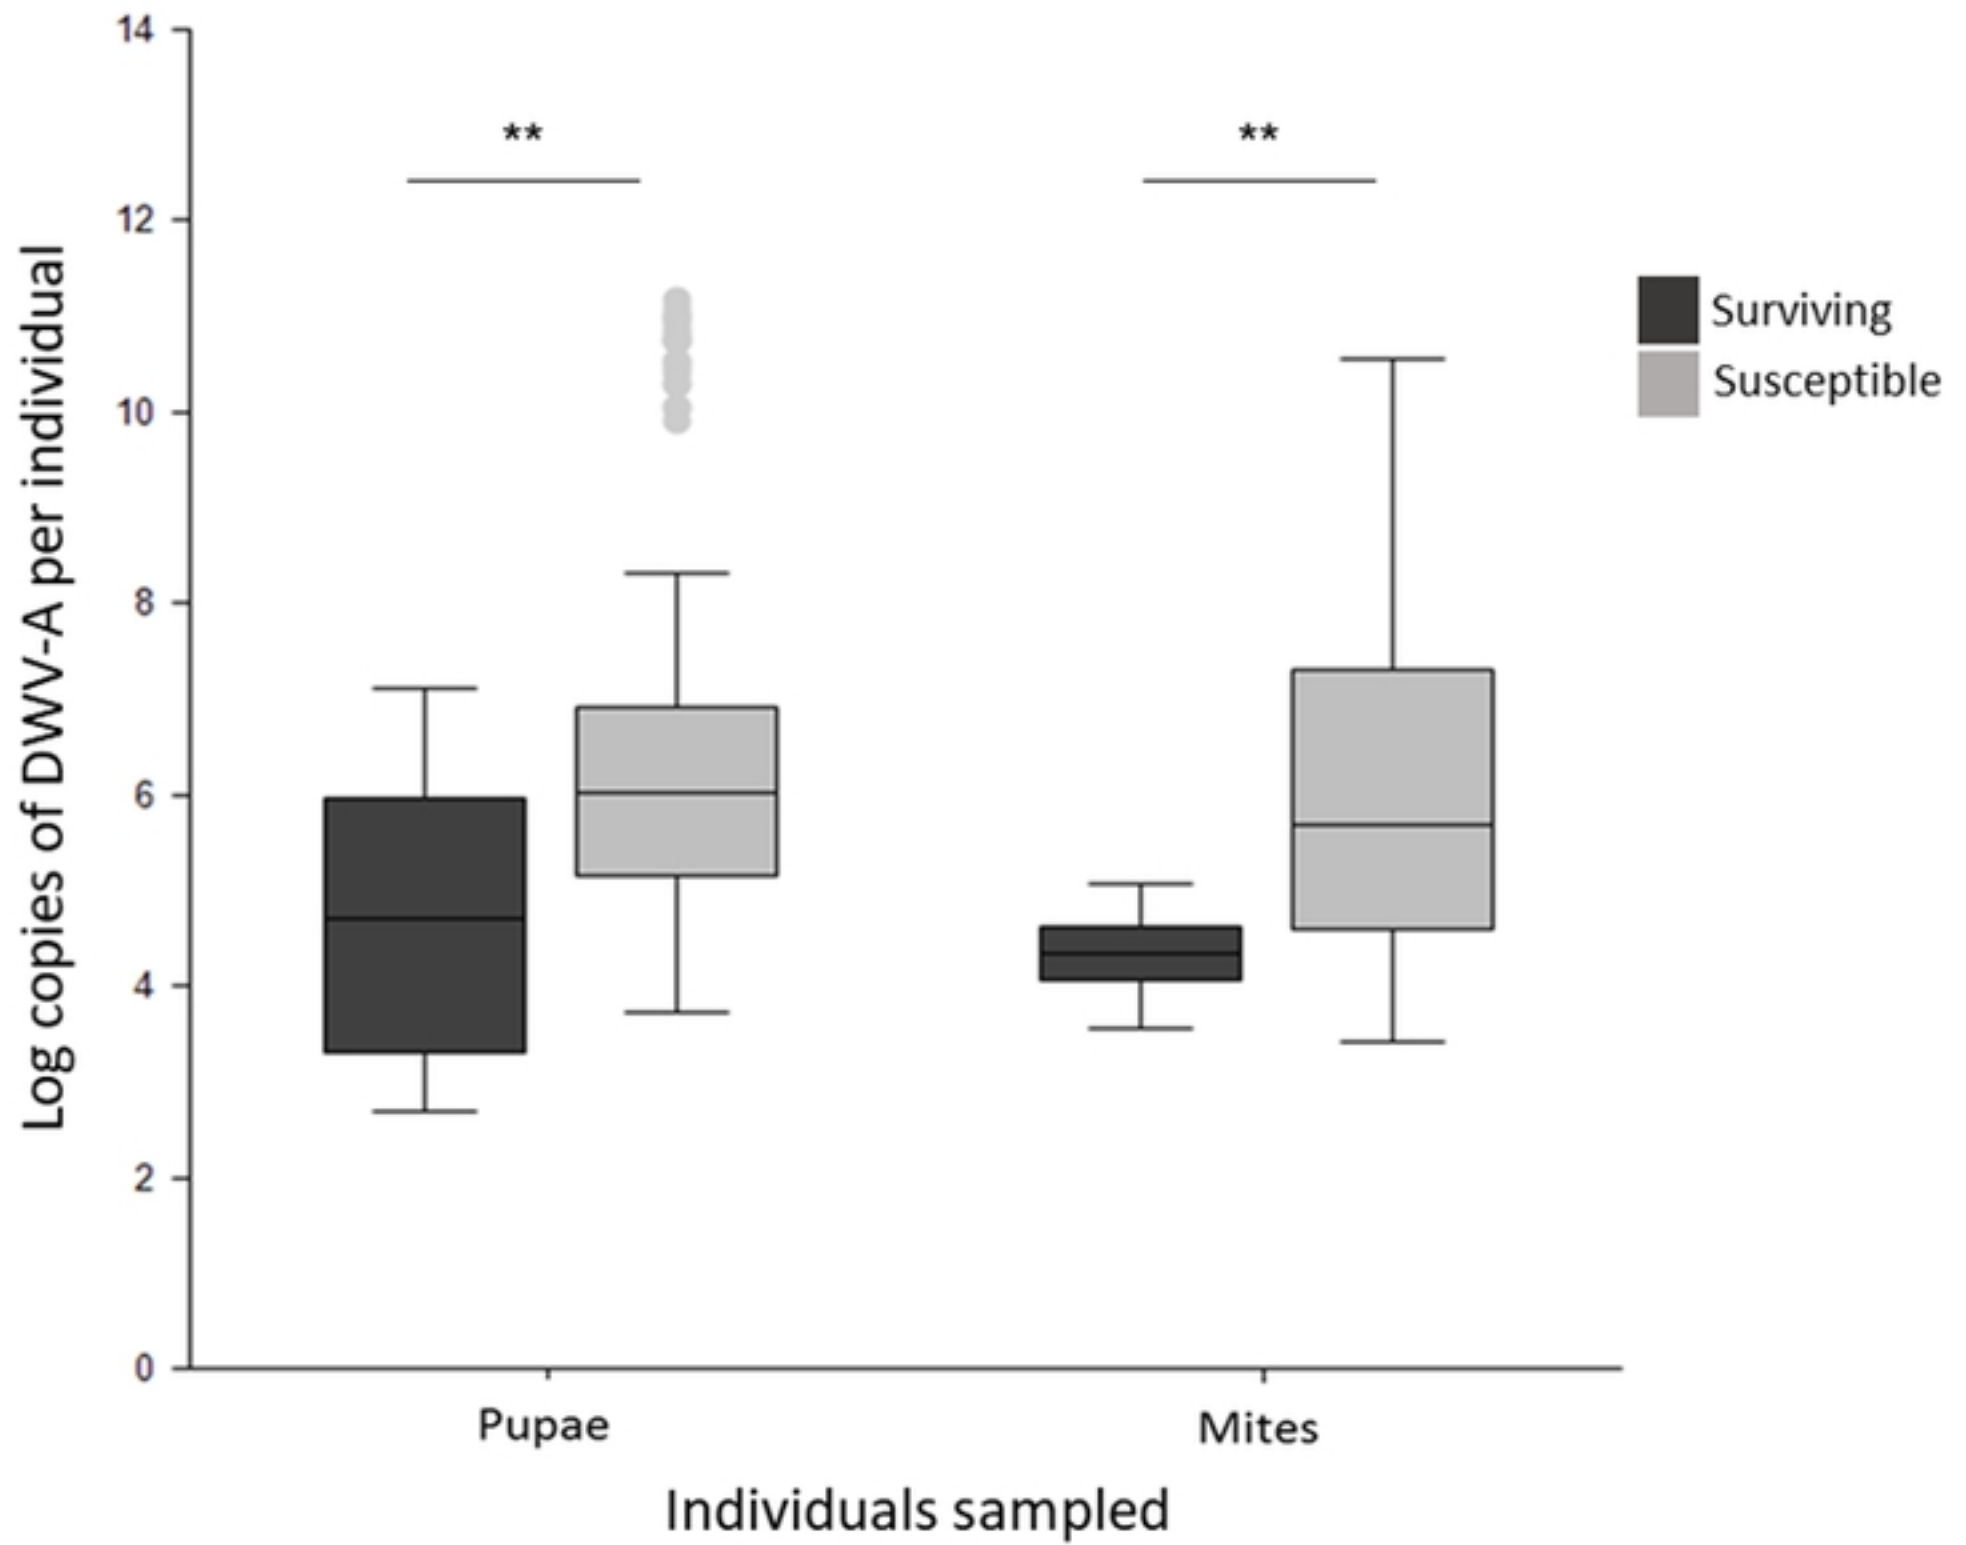

Figure 4
